# Supplementary material for: Key role of exportin 6 in exosome-mediated viral transmission from insect vectors to plants
Source: PubMed Central journal article supplement — Proc Natl Acad Sci U S A. 2022 Aug 29;119(36):e2207848119. doi: 10.1073/pnas.2207848119 (PMC9457540; doi:10.1073/pnas.2207848119), 2022-08-29
Supplement: pnas.2207848119.sapp.pdf [file pnas.2207848119.sapp.pdf]

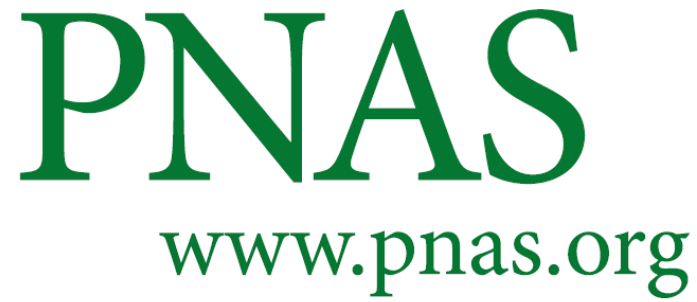

Supplementary Information for

**Key role of exportin 6 in exosome-mediated viral transmission from insect  
vectors to plants**

Hong Lu<sup>1#</sup>, Jiaming Zhu<sup>1,2#</sup>, Jinting Yu<sup>1,2</sup>, Qiong Li<sup>1,2</sup>, Lan Luo<sup>1</sup>, Feng Cui<sup>1,2\*</sup>

Feng Cui

Tel: +86-10-64807218, Email: cuif@ioz.ac.cn.

**This PDF file includes:**

Figures S1 to S6

Table S1

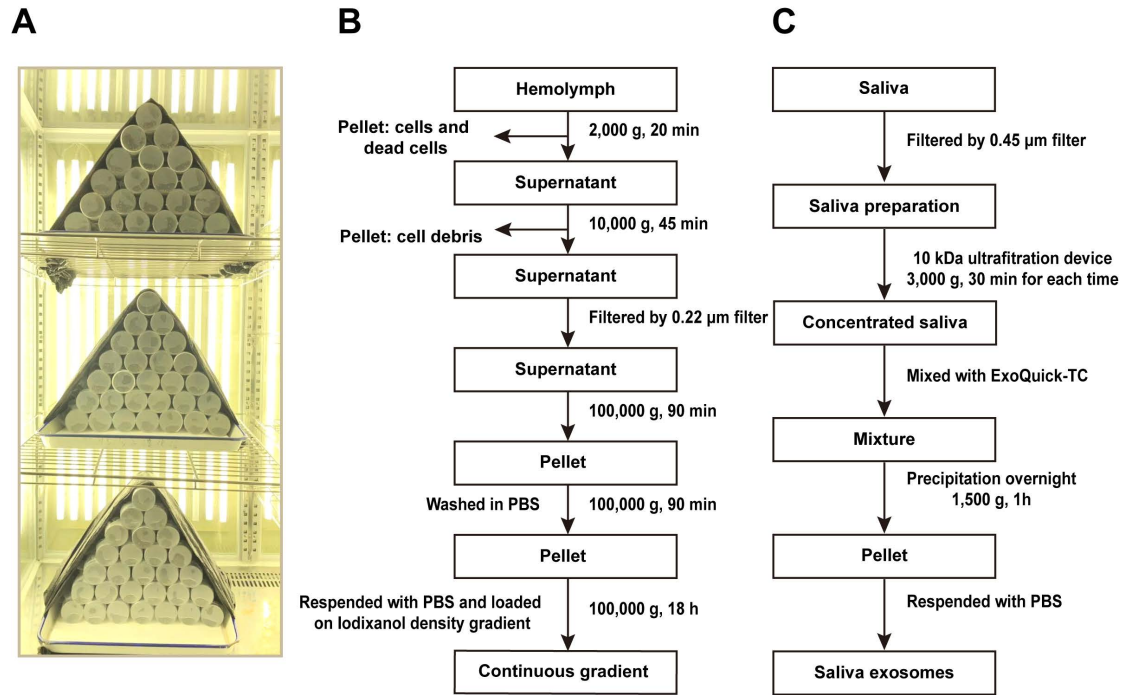

**Figure S1. Saliva collection device (A) and procedures for exosome isolation from the hemolymph (B) and saliva (C) of planthoppers.**

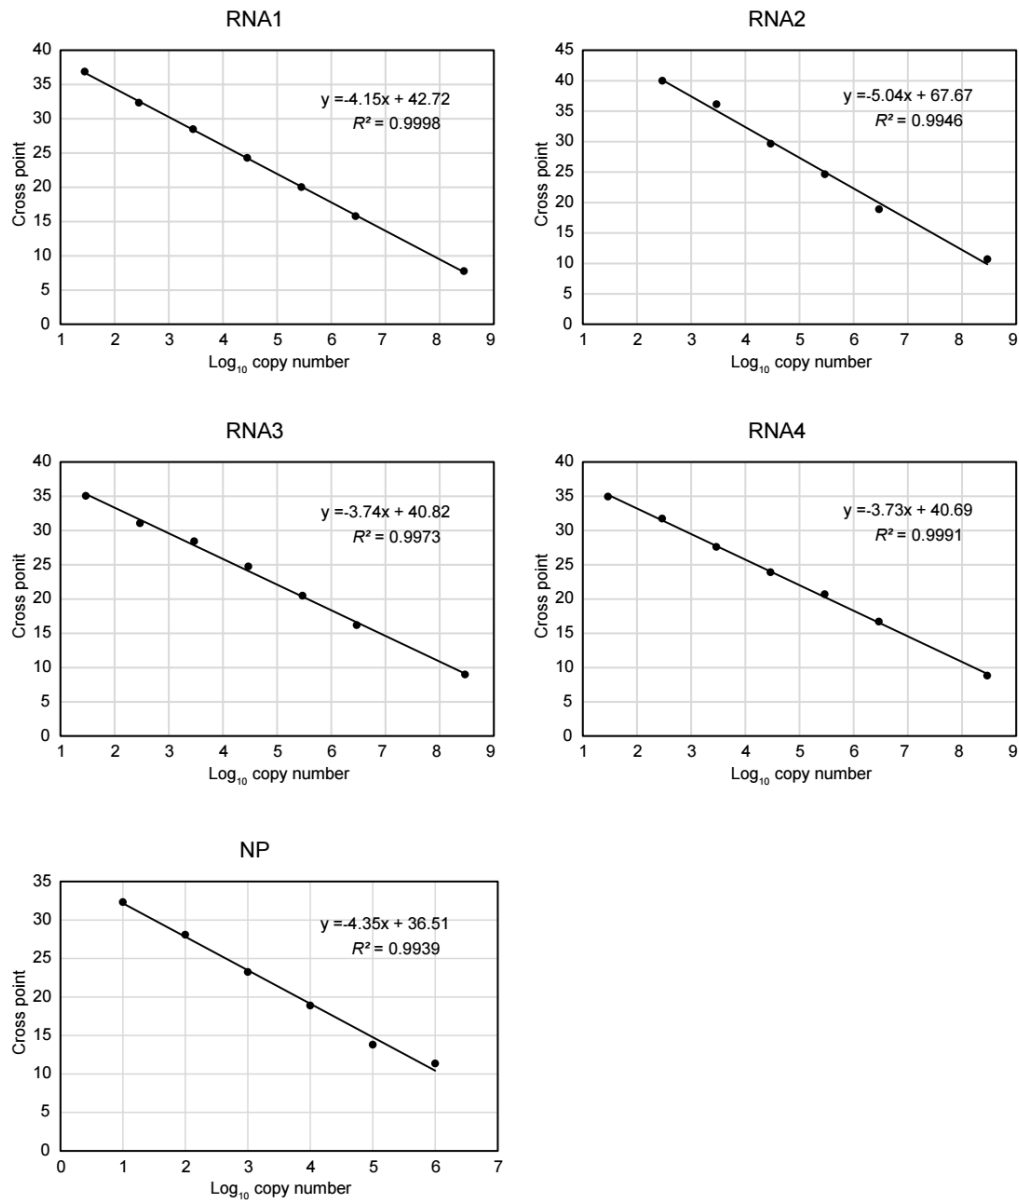

**Figure S2. Standard curves for four genomic RNAs and NP of RSV.** The logarithm of the gene copy number in a series of **ten-fold** dilution samples (x axis) was plotted against the corresponding crossing point value (y axis) to generate the standard curves. The linear regression equation and the coefficient of determination ( $R^2$ ) are shown.

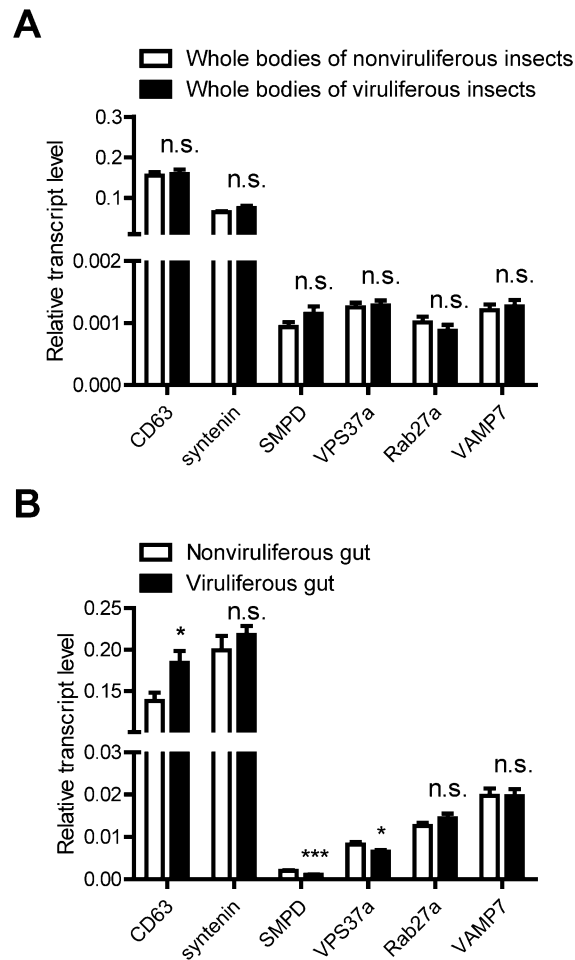

**Figure S3. Comparison of relative transcript levels of *CD63*, *syntenin*, *SMPD*, *VPS37a*, *Rab27a* or *VAMP7* in the whole bodies (A) and guts (B) of viruliferous and nonviruliferous adult planthoppers as measured by real-time quantification PCR. The transcript level of each gene was normalized to that of *EF2*. \*,  $P < 0.05$ . \*\*\*,  $P < 0.001$ . n.s., no significant difference.**

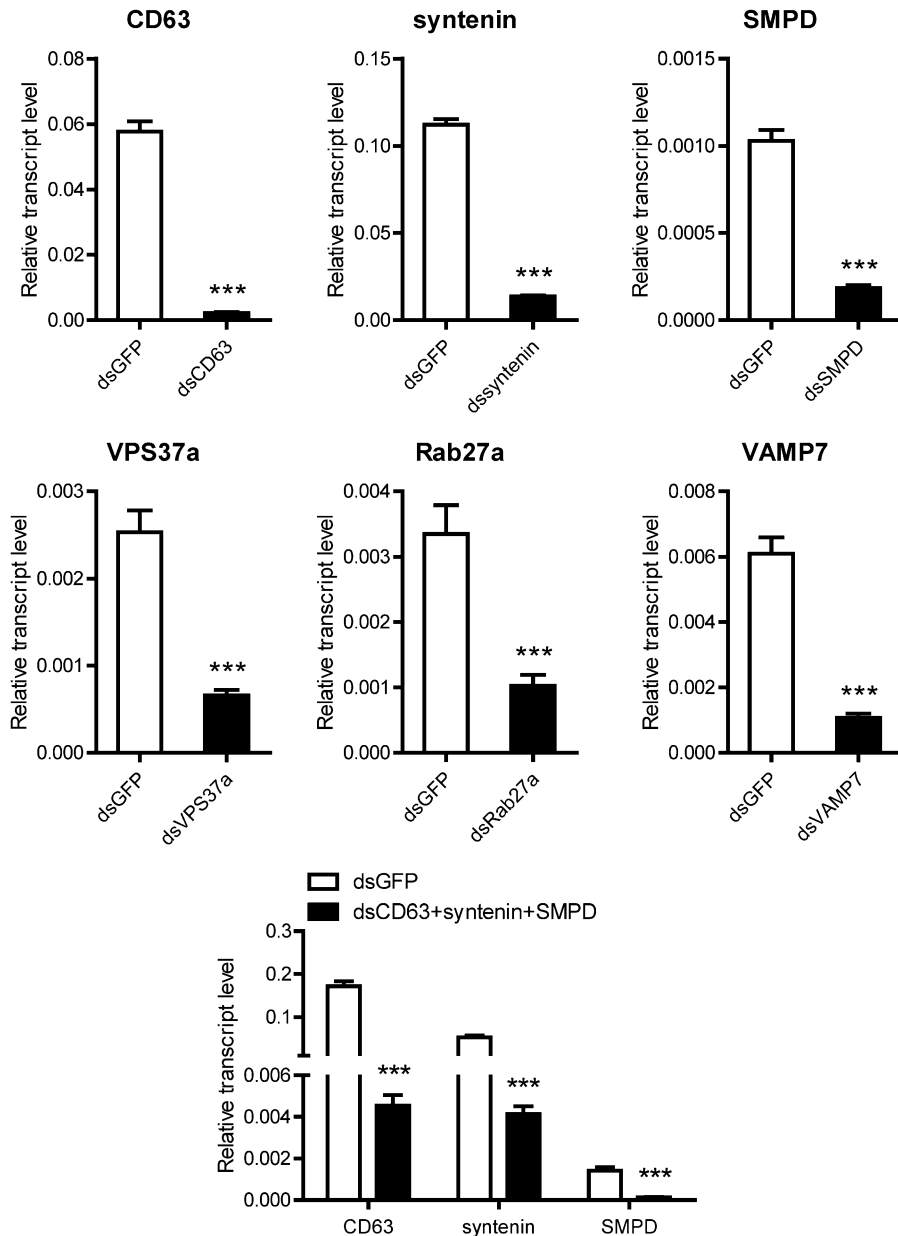

**Figure S4. Relative transcript levels of six genes of the insect exosome systems in the viruliferous planthoppers at 7 d after the injection of double-stranded RNAs (dsRNAs) measured by real-time quantification PCR.** dsRNAs for each gene (dsCD63, dsSyntenin, dsSMPD, dsVPS37a, dsRab27a, dsVAMP7) or for three genes together (dsCD63+syntenin+SMPD) were injected. The control group was injected with *GFP* dsRNA (dsGFP). The transcript level of each gene was normalized to that of *EF2*. \*\*\*,  $P < 0.001$ .

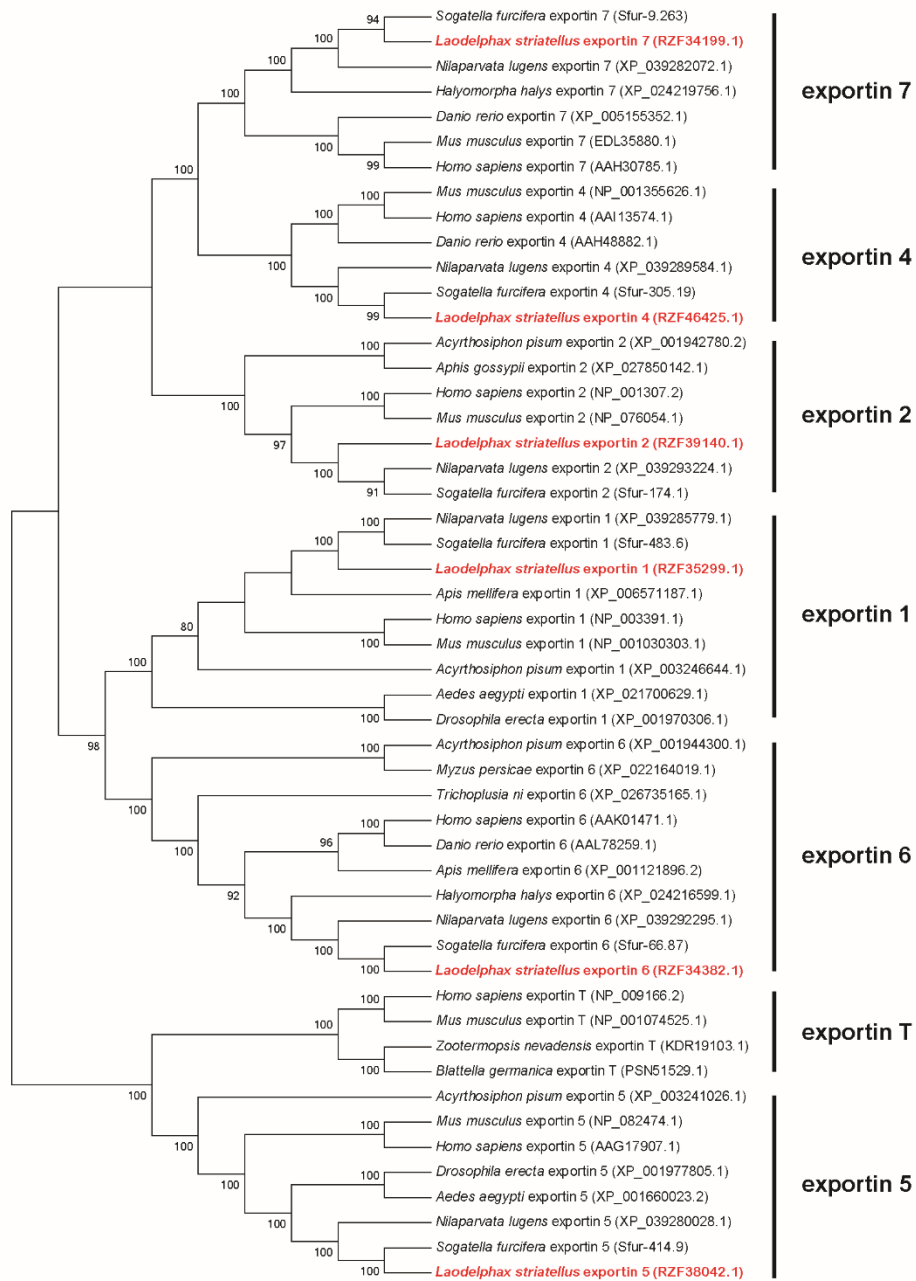

**Figure S5. Phylogenetic neighbor-joining tree of exportins.** Bootstrap values higher than 70% are shown at the nodes. GenBank registration numbers are given in parentheses.

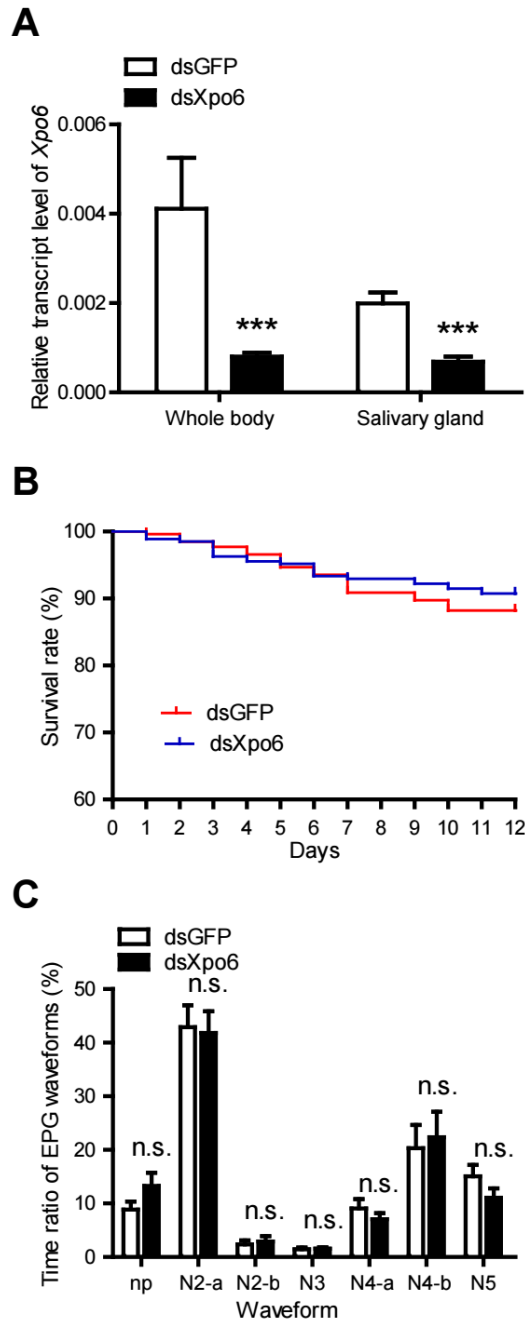

**Figure S6. Survival curves and feeding behaviors of planthoppers after *exportin 6* knockdown.** (A) Relative transcript levels of *exportin 6* (Xpo6) to that of planthopper *EF2* in the whole bodies and salivary glands of planthoppers at 8 d after injection of dsRNAs for *exportin 6* (dsXpo6). The control group was injected with *GFP* dsRNA (dsGFP). \*\*\*,  $P < 0.001$ . (B) Survival curves of planthoppers on rice plants after injection of dsXpo6 or dsGFP. No significant difference was observed between the two curves according to the Mantel–Cox log-rank statistic test. (C) Time ratios of EPG

waveforms of viruliferous planthoppers on rice plants after injection of dsXpo6 or dsGFP. np, non-probing. N2-a, salivation and movement of stylet. N2-b, sustained salivation. N3, extracellular movement of stylet near the phloem region. N4-a, watery salivation. N4-b, passive ingestion. N5, drinking from xylem. n.s., no significant difference.



**Table S1. Primers used in this study.**

| Primer name    | Sequence (5' to 3')          |
|----------------|------------------------------|
| EF2-q-F        | GTCTCCACGGATGGGCTTT          |
| EF2-q-R        | ATCTTGAATTTCTCGGCATACATTT    |
| Tubulin-q-F    | GCTGACCACACCTAGCTTTGG        |
| Tubulin-q-R    | AGGGAACCTTAGGCAGCATGT        |
| NP-q-F         | GGAACAAATGCCAATGCTATC        |
| NP-q-R         | TGAGACATTTGGGAATAGCTGA       |
| RNA1-q-F       | GGTACATGATTCAAGAGATAGG       |
| RNA1-q-R       | TCAATGGTGCCTGGACTT           |
| RNA2-q-F       | CCCACAGGCACACACACACTGGCTA    |
| RNA2-q-R       | ACCCGGATGTGGTGCCTAGCACCATTTC |
| RNA3-q-F       | TCATGACCCAAAAAACTGCACACCACTG |
| RNA3-q-R       | TTGGCCAATCATGGCTTTAGGCAAAAG  |
| RNA4-q-F       | GTGGCAAAAACACCCATATGCATGA    |
| RNA4-q-R       | CGCACTTGATGTGGTCTGTTCTGCTCTG |
| CD63-q-F       | GCCATCAAGGAGAGCAAT           |
| CD63-q-R       | CATACCACTCGCCATACG           |
| syntenin-q-F   | TTCGCAAGAGCACTGTCAATG        |
| syntenin-q-R   | GTCCATCCACTTCCAGGAGATT       |
| SMPD-q-F       | ATACGATTGACGGCAGAC           |
| SMPD-q-R       | TTACTCTTGACGGCATAACT         |
| VPS37a-q-F     | GAAGAGCAGTCAACATCATC         |
| VPS37a-q-R     | GGAGTGGTGGAGTAGGAA           |
| Rab27a-q-F     | TCGCAGTTCATATCAACAGT         |
| Rab27a-q-R     | CCATTACACCACGGAGGA           |
| VAMP7-q-F      | CATTCCGAGCGACAAGTA           |
| VAMP7-q-R      | GTCAATCCACAAGACATAGC         |
| Exportin 6-q-F | GAGTGAATCATTGGCAACTT         |
| Exportin 6-q-R | TCTTCCAGGCACCATCTT           |

---

|                      |                                                                      |
|----------------------|----------------------------------------------------------------------|
| CD63-dsRNA-F         | CTGGAGGAATCACTGGTTAC                                                 |
| CD63-dsRNA-R         | ATACTCACGACGGATGGAA                                                  |
| CD63-dsRNA-T7F       | TAATACGACTCACTATAGGCTGGAGGAATCACTGGTTAC                              |
| CD63-dsRNA-T7R       | TAATACGACTCACTATAGGATACTCACGACGGATGGAA                               |
| syntenin-dsRNA-F     | AACAGTCTCGCCAACTTC                                                   |
| syntenin-dsRNA-R     | GCCATTGACAGTGCTCTT                                                   |
| syntenin-dsRNA-T7F   | TAATACGACTCACTATAGGAACAGTCTCGCCAACTTC                                |
| syntenin-dsRNA-T7R   | TAATACGACTCACTATAGGGCCATTGACAGTGCTCTT                                |
| SMPD-dsRNA-F         | CGTAACAGTTATGCCGTCAAGA                                               |
| SMPD-dsRNA-R         | CACCGTCGCAGCACTACTA                                                  |
| SMPD-dsRNA-T7F       | TAATACGACTCACTATAGGCGTAACAGTTATGCCGTCAAGA                            |
| SMPD-dsRNA-T7R       | TAATACGACTCACTATAGGCACCGTCGCAGCACTACTA                               |
| VPS37a-dsRNA-F       | TCCTACTCCACCACTCCT                                                   |
| VPS37a-dsRNA-R       | CTATTCTCATAAGCCACCAAG                                                |
| VPS37a-dsRNA-T7F     | TAATACGACTCACTATAGGTCCTACTCCACCACTCCT                                |
| VPS37a-dsRNA-T7R     | TAATACGACTCACTATAGGCTATTCTCATAAGCCACCAAG                             |
| Rab27a-dsRNA-F       | TCACCAATGAGCAATCGT                                                   |
| Rab27a-dsRNA-R       | TTATCCACAGTTGACTCCAT                                                 |
| Rab27a-dsRNA-T7F     | TAATACGACTCACTATAGGTCACCAATGAGCAATCGT                                |
| Rab27a-dsRNA-T7R     | TAATACGACTCACTATAGGTTATCCACAGTTGACTCCAT                              |
| VAMP7-dsRNA-F        | TGTGTATTGCTGATGATGAG                                                 |
| VAMP7-dsRNA-R        | CTACTTGTCGCTCGGAAT                                                   |
| VAMP7-dsRNA-T7F      | TAATACGACTCACTATAGGTGTGTATTGCTGATGATGAG                              |
| VAMP7-dsRNA-T7R      | TAATACGACTCACTATAGGCTACTTGTCGCTCGGAAT                                |
| Exportin 6-dsRNA-F   | GATACTGCTCTGGCTACTATT                                                |
| Exportin 6-dsRNA-R   | GGTCGTTGTTCTGGTTCA                                                   |
| Exportin 6-dsRNA-T7F | TAATACGACTCACTATAGGGATACTGCTCTGGCTACTATT                             |
| Exportin 6-dsRNA-T7R | TAATACGACTCACTATAGGGGTCGTTGTTCTGGTTCA                                |
| NP-Flag-F            | AGGAGATATAACCATGGGCATGGGTACCAACAAGCCAGCCAC                           |
| NP-Flag-R            | GACGGAGCTCGAATTCTTACTTGTCATCGTCGTCCTTGTAGTCG<br>TCATCTGCACCTTCTGCCTC |

---

---

|               |                                                                      |
|---------------|----------------------------------------------------------------------|
| Xpo6-N-His-F  | AATGGGTCGCGGATCCATGAGTGAATCATTGGCAAC                                 |
| Xpo6-N-His-R  | GGTGGTGGTGCTCGAGTGAATTGCATTCTTCACCCCAG                               |
| Xpo6-C-His-F  | AATGGGTCGCGGATCCGTATGTCGTGAAGATAAAATTAG                              |
| Xpo6-C-His-R  | GGTGGTGGTGCTCGAGTCCAACACTAACGGGTGAAGAGG                              |
| VPS37a-His-F  | AATGGGTCGCGGATCCATGTTGAATAGATCAAACAT                                 |
| VPS37a-His-R  | GGTGGTGGTGCTCGAGATAGCTGGCTCTTTTCAGTTC                                |
| VPS37a-Flag-F | AGGAGATATACCATGGGCATGTTGAATAGATCAAACAT                               |
| VPS37a-Flag-R | GCTCGAATTCGGATCCTTACTTGTCATCGTCGTCCTTGTAGTC<br>ATAGCTGGCTCTTTTCAGTTC |

---
